# Supplementary material for: Evaluation of early antimicrobial therapy adaptation guided by the BetaLACTA® test: a case-control study
Source: Springer Nature journal article supplement (doi:10.1186/s13054-017-1746-6), 2017-06-27
Supplement: MOESM2 [file 12489026]

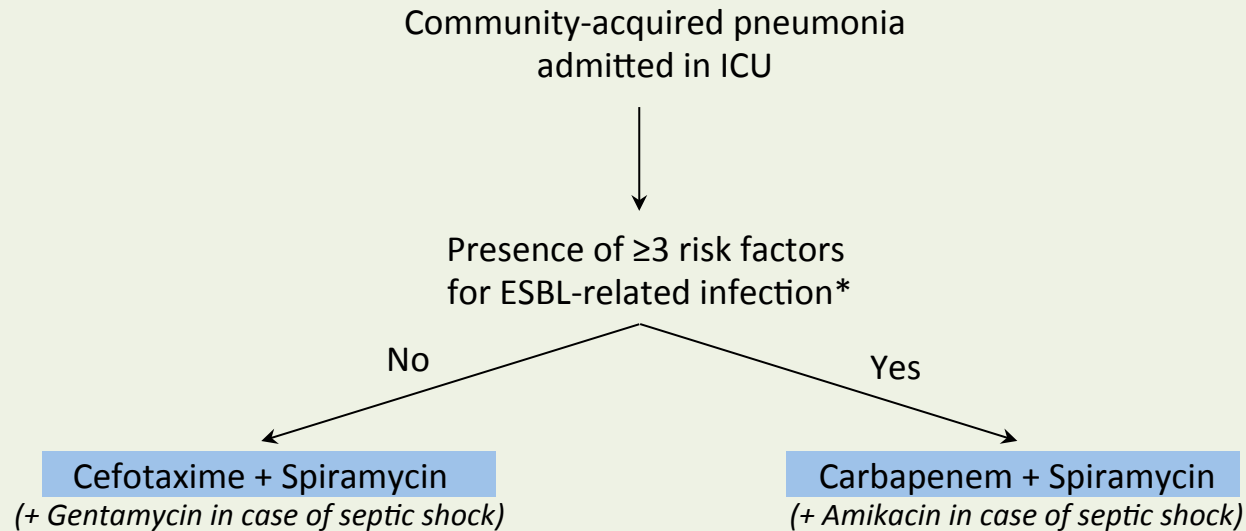

\* Antimicrobial therapy (amoxicillin/clavulanate, 3rd generation cephalosporins or fluoroquinolons) in the last 3 months, hospital admission for more than 48h in the last 3 months, hospital admission in an ESBL-endemic country in the last 6 months, immunosuppression, chronic enteral nutrition, prior recurrent urinary tract disease, life in institutions or nursing home

Hospital-acquired pneumonia  
admitted in ICU

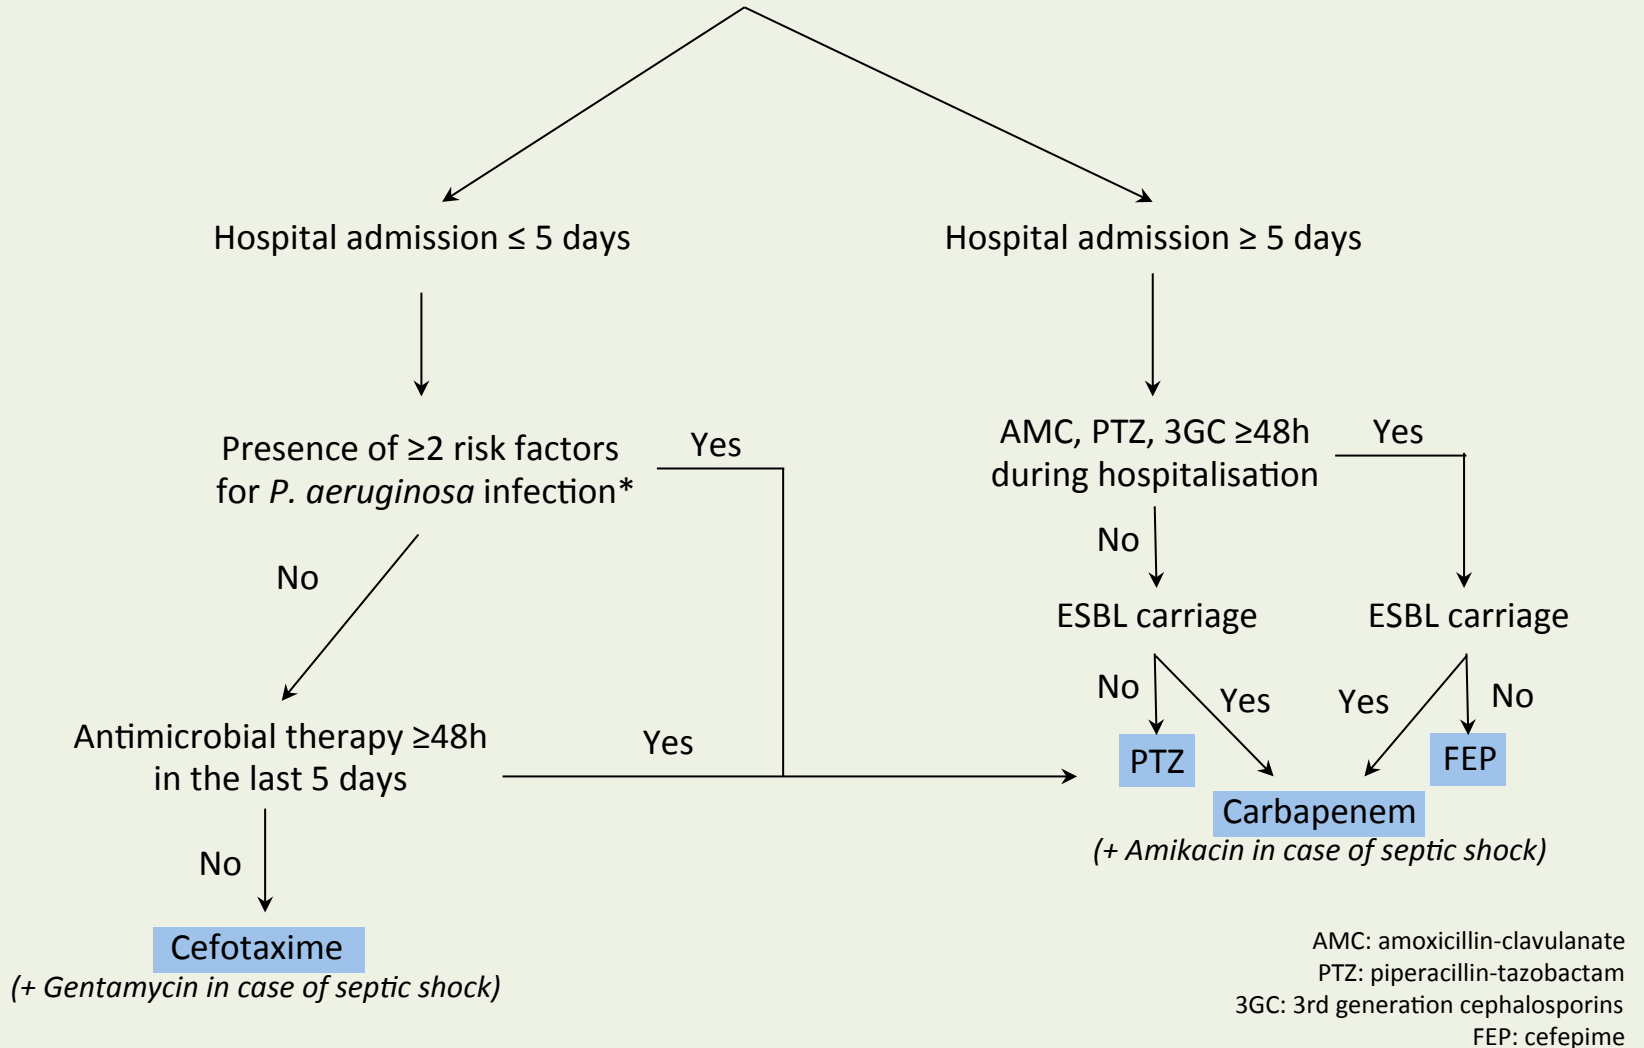

\* Antimicrobial therapy (amoxicillin/clavulanate, 3rd generation cephalosporins or fluoroquinolons) in the last 3 months or >4 times/year, hospital admission for more than 48h in the last 6 months, immunosuppression, COPD patient with FEV <30%, bronchiectasis

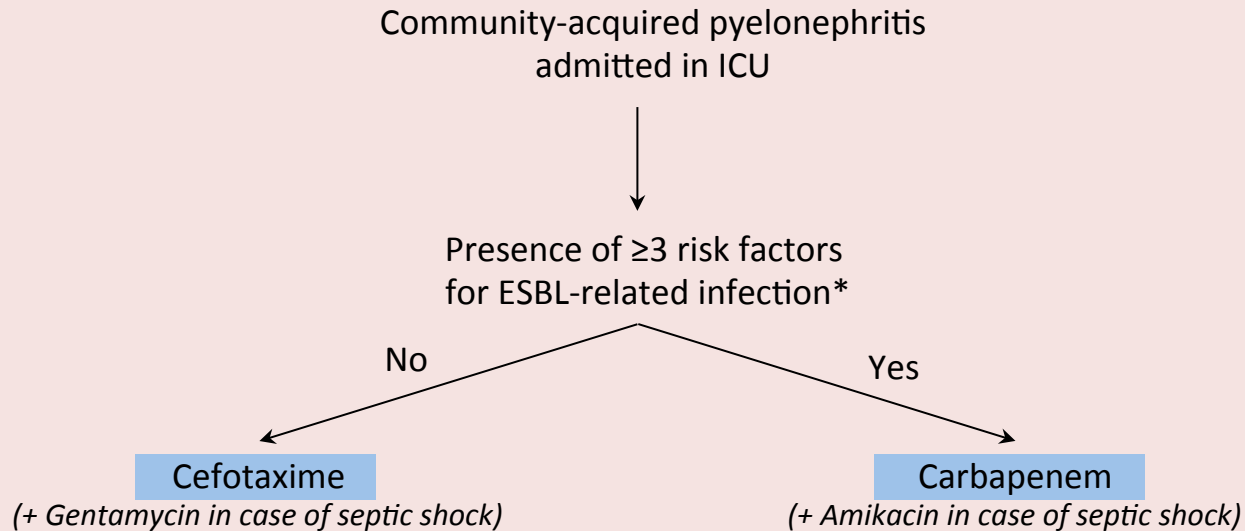

\* Antimicrobial therapy (amoxicillin/clavulanate, 3rd generation cephalosporins or fluoroquinolones) in the last 3 months, hospital admission for more than 48h in the last 3 months, hospital admission in an ESBL-endemic country in the last 6 months, immunosuppression, chronic enteral nutrition, prior recurrent urinary tract disease, life in institutions or nursing home

Hospital-acquired pyelonephritis  
admitted in ICU

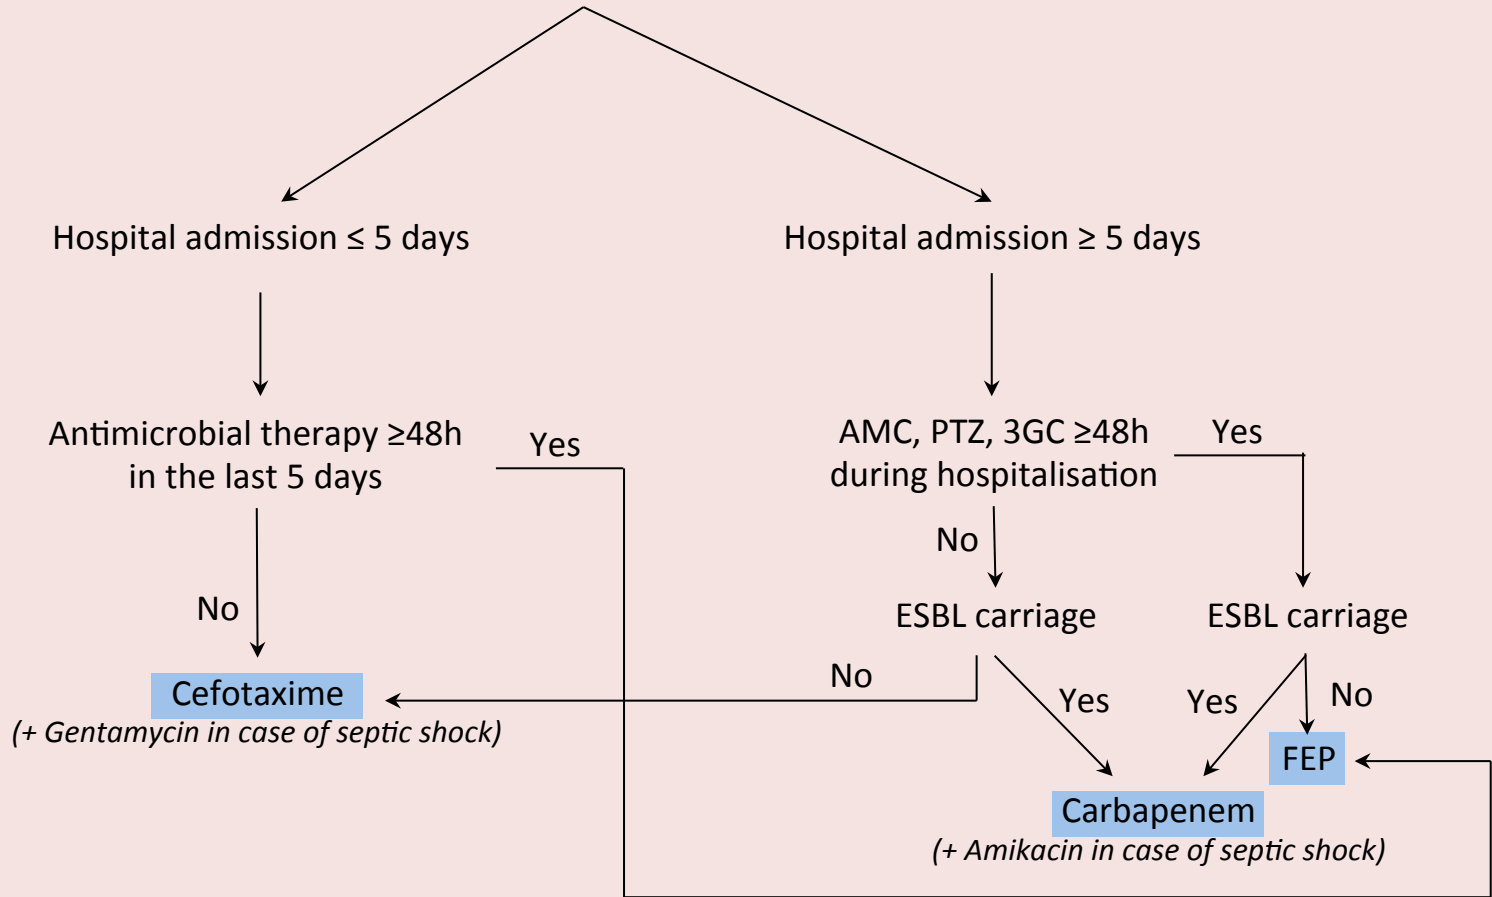

AMC: amoxicillin-clavulanate  
PTZ: piperacillin-tazobactam  
3GC: 3rd generation cephalosporins  
FEP: cefepime

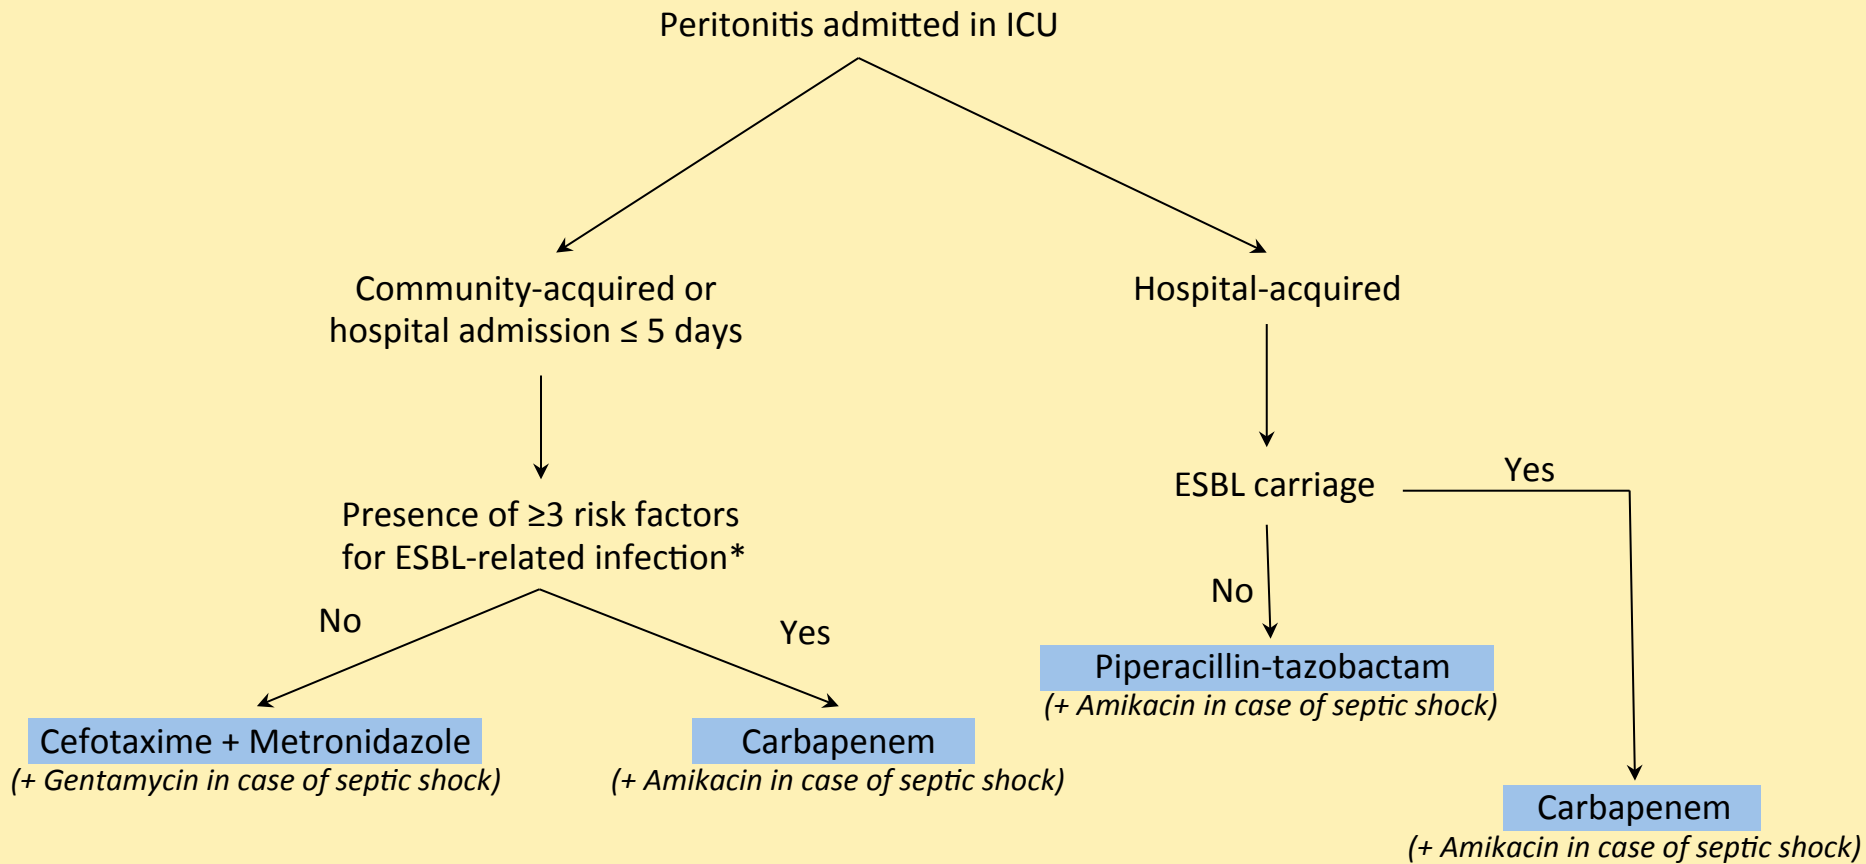

\* Antimicrobial therapy (amoxicillin/clavulanate, 3rd generation cephalosporins or fluoroquinolones) in the last 3 months, hospital admission for more than 48h in the last 3 months, hospital admission in an ESBL-endemic country in the last 6 months, immunosuppression, chronic enteral nutrition, prior recurrent urinary tract disease, life in institutions or nursing home
