# Supplementary material for: Evaluation of early antimicrobial therapy adaptation guided by the BetaLACTA® test: a case-control study
Source: Springer Nature journal article supplement (doi:10.1186/s13054-017-1746-6), 2017-06-27
Supplement: MOESM3 [file 12489026]

| Patient number                                          | Type of infection     | Site of infection | Isolated enterobacteriaceae   | Resistance phenotype                     | BetaLACTA test result | Empirical antimicrobial therapy | BLT-guided adaptation   | Delay: sampling > BLT result (hours) | Delay: sampling > antibiogram result (hours) | Delay: sample arrival in the lab > BLT result (hours) | Delay: sample arrival in the lab > antibiogram result (hours) |
|---------------------------------------------------------|-----------------------|-------------------|-------------------------------|------------------------------------------|-----------------------|---------------------------------|-------------------------|--------------------------------------|----------------------------------------------|-------------------------------------------------------|---------------------------------------------------------------|
| <b>Escalations</b>                                      |                       |                   |                               |                                          |                       |                                 |                         |                                      |                                              |                                                       |                                                               |
| #5                                                      | Healthcare associated | Pneumonia         | <i>Enterobacter cloacae</i>   | AmpC overproduction                      | Positive              | Ceftazidim                      | Doripenem               | 36                                   | 60                                           | 27                                                    | 51                                                            |
| #8                                                      | Healthcare associated | Pneumonia         | <i>Enterobacter cloacae</i>   | ESBL                                     | Positive              | Cefotaxime                      | Doripenem               | 28                                   | 52                                           | 27                                                    | 51                                                            |
| #20                                                     | Healthcare associated | Pneumonia         | <i>Escherichia coli</i>       | ESBL                                     | Positive              | Piperacillin + Tazobactam       | Doripenem               | 24                                   | 52                                           | 24                                                    | 52                                                            |
| #25                                                     | Healthcare associated | Pneumonia         | <i>Enterobacter cloacae</i>   | ESBL                                     | Positive              | Cefotaxime                      | Imipenem                | 28                                   | 52                                           | 28                                                    | 52                                                            |
| #29                                                     | Healthcare associated | Pneumonia         | <i>Escherichia coli</i>       | ESBL                                     | Positive              | Piperacillin + Tazobactam       | Meropenem               | 28                                   | 100                                          | 26                                                    | 98                                                            |
| #21                                                     | Healthcare associated | Pneumonia         | <i>Enterobacter aerogenes</i> | ESBL                                     | Positive              | Piperacillin + Tazobactam       | Meropenem               | 43                                   | 67                                           | 26                                                    | 50                                                            |
| #46                                                     | Community acquired    | Pneumonia         | <i>Klebsiella pneumoniae</i>  | ESBL                                     | Positive              | Piperacillin + Tazobactam       | Imipenem                | 24                                   | 72                                           | 21                                                    | 69                                                            |
| #54                                                     | Community acquired    | Pneumonia         | <i>Escherichia coli</i>       | ESBL                                     | Positive              | Piperacillin + Tazobactam       | Meropenem               | 35                                   | 58                                           | 29                                                    | 52                                                            |
| #61                                                     | Healthcare associated | UTI               | <i>Klebsiella oxytoca</i>     | ESBL                                     | Positive              | Piperacillin + Tazobactam       | Meropenem               | 35                                   | 57                                           | 23                                                    | 45                                                            |
| <b>De-escalations</b>                                   |                       |                   |                               |                                          |                       |                                 |                         |                                      |                                              |                                                       |                                                               |
| #3                                                      | Healthcare associated | Pneumonia         | <i>Enterobacter cloacae</i>   | Wild type                                | Negative              | Piperacillin + Tazobactam       | Cefotaxime              | 36                                   | 60                                           | 27                                                    | 51                                                            |
|                                                         |                       |                   | <i>Proteus Mirabilis</i>      | Wild type                                | Negative              |                                 |                         |                                      |                                              |                                                       |                                                               |
| #7                                                      | Healthcare associated | Pneumonia         | <i>Serratia marcescens</i>    | Wild type                                | Negative              | Piperacillin + Tazobactam       | Cefotaxime              | 36                                   | 60                                           | 28                                                    | 52                                                            |
| #9                                                      | Healthcare associated | Pneumonia         | <i>Escherichia coli</i>       | Inhibitor-resistant TEM                  | Negative              | Doripenem                       | Cefotaxime              | 28                                   | 52                                           | 27                                                    | 51                                                            |
| #12                                                     | Healthcare associated | UTI               | <i>Klebsiella pneumoniae</i>  | Acquired penicillinase                   | Negative              | Meropenem                       | Cefotaxime              | 27                                   | 51                                           | 26                                                    | 50                                                            |
| #13                                                     | Healthcare associated | Pneumonia         | <i>Citrobacter koseri</i>     | Wild type                                | Negative              | Piperacillin + Tazobactam       | Cefotaxime              | 38                                   | 66                                           | 24                                                    | 52                                                            |
| #15                                                     | Healthcare associated | Pneumonia         | <i>Escherichia coli</i>       | Acquired penicillinase                   | Negative              | Piperacillin + Tazobactam       | Cefotaxime              | 28                                   | 52                                           | 26                                                    | 50                                                            |
| #16                                                     | Healthcare associated | UTI               | <i>Escherichia coli</i>       | Wild type                                | Negative              | Imipenem                        | Cefotaxime              | 24                                   | 48                                           | 22                                                    | 46                                                            |
| #34                                                     | Community acquired    | Pneumonia         | <i>Escherichia coli</i>       | Acquired penicillinase                   | Negative              | Piperacillin + Tazobactam       | Cefotaxime              | 28                                   | 52                                           | 24                                                    | 48                                                            |
| #35                                                     | Community acquired    | Pneumonia         | <i>Enterobacter cloacae</i>   | Acquired penicillinase                   | Negative              | Piperacillin + Tazobactam       | Cefotaxime              | 40                                   | 64                                           | 27                                                    | 51                                                            |
| #37                                                     | Healthcare associated | Pneumonia         | <i>Enterobacter cloacae</i>   | Wild type                                | Negative              | Meropenem                       | Cefotaxime              | 49                                   | 73                                           | 27                                                    | 51                                                            |
| #49                                                     | Community acquired    | UTI               | <i>Klebsiella pneumoniae</i>  | Wild type                                | Negative              | Meropenem                       | Cefotaxime              | 64                                   | 86                                           | 51                                                    | 73                                                            |
| #50                                                     | Community acquired    | Pneumonia         | <i>Enterobacter cloacae</i>   | Wild type                                | Negative              | Piperacillin + Tazobactam       | Cefotaxime              | 29                                   | 77                                           | 27                                                    | 75                                                            |
| #51                                                     | Healthcare associated | Abcess            | <i>Enterobacter cloacae</i>   | Wild type                                | Negative              | Imipenem                        | Cefotaxime              | 50                                   | 74                                           | 48                                                    | 72                                                            |
| #53                                                     | Community acquired    | Pneumonia         | <i>Klebsiella pneumoniae</i>  | Wild type                                | Negative              | Piperacillin + Tazobactam       | Cefotaxime              | 42                                   | 64                                           | 27                                                    | 49                                                            |
| #55                                                     | Community acquired    | UTI               | <i>Klebsiella pneumoniae</i>  | Wild type                                | Negative              | Meropenem                       | Cefotaxime              | 40                                   | 63                                           | 25                                                    | 48                                                            |
| #57                                                     | Healthcare associated | UTI               | <i>Escherichia coli</i>       | Acquired penicillinase                   | Negative              | Piperacillin + Tazobactam       | Cefotaxime              | 37                                   | 61                                           | 27                                                    | 51                                                            |
| #59                                                     | Healthcare associated | Pneumonia         | <i>Citrobacter koseri</i>     | Wild type                                | Negative              | Meropenem                       | Cefotaxime              | 23                                   | 45                                           | 22                                                    | 44                                                            |
| <b>Empirical beta-lactam confirmations</b>              |                       |                   |                               |                                          |                       |                                 |                         |                                      |                                              |                                                       |                                                               |
| <i>Empirical carbapenem confirmation</i>                |                       |                   |                               |                                          |                       |                                 |                         |                                      |                                              |                                                       |                                                               |
| #1                                                      | Healthcare associated | Pneumonia         | <i>Klebsiella pneumoniae</i>  | ESBL                                     | Positive              | Doripenem                       | Doripenem               | 24                                   | 49                                           | 20                                                    | 45                                                            |
| #41                                                     | Healthcare associated | Pneumonia         | <i>Klebsiella pneumoniae</i>  | ESBL                                     | Positive              | Meropenem                       | Meropenem               | 28                                   | 52                                           | 27                                                    | 51                                                            |
| #45                                                     | Healthcare associated | Pleurisy          | <i>Klebsiella pneumoniae</i>  | ESBL                                     | Positive              | Imipenem                        | Imipenem                | 24                                   | 48                                           | 23                                                    | 47                                                            |
| #60                                                     | Healthcare associated | Peritonitis       | <i>Escherichia coli</i>       | ESBL                                     | Positive              | Meropenem                       | Meropenem               | 59                                   | 83                                           | 47                                                    | 61                                                            |
| <i>Empirical Cefotaxime confirmation</i>                |                       |                   |                               |                                          |                       |                                 |                         |                                      |                                              |                                                       |                                                               |
| #2                                                      | Community acquired    | Pneumonia         | <i>Serratia marcescens</i>    | Wild type                                | Negative              | Cefotaxime                      | Cefotaxime              | 60                                   | 84                                           | 51                                                    | 75                                                            |
| #4                                                      | Healthcare associated | Pneumonia         | <i>Klebsiella pneumoniae</i>  | Wild type                                | Negative              | Cefotaxime                      | Cefotaxime              | 24                                   | 48                                           | 24                                                    | 48                                                            |
| #6                                                      | Community acquired    | Pneumonia         | <i>Escherichia coli</i>       | Wild type                                | Negative              | Cefotaxime                      | Cefotaxime              | 36                                   | 60                                           | 26                                                    | 50                                                            |
| #10                                                     | Community acquired    | Pneumonia         | <i>Klebsiella pneumoniae</i>  | Wild type                                | Negative              | Cefotaxime                      | Cefotaxime              | 28                                   | 52                                           | 28                                                    | 52                                                            |
| #11                                                     | Healthcare associated | UTI               | <i>Escherichia coli</i>       | Acquired penicillinase                   | Negative              | Cefotaxime                      | Cefotaxime              | 28                                   | 52                                           | 24                                                    | 48                                                            |
| #14                                                     | Community acquired    | UTI               | <i>Escherichia coli</i>       | Acquired penicillinase                   | Negative              | Cefotaxime                      | Cefotaxime              | 34                                   | 62                                           | 22                                                    | 50                                                            |
| #17                                                     | Healthcare associated | Pneumonia         | <i>Morganella morganii</i>    | Wild-type                                | Negative              | Cefotaxime                      | Cefotaxime              | 24                                   | 48                                           | 24                                                    | 48                                                            |
|                                                         |                       |                   | <i>Proteus mirabilis</i>      | Acquired penicillinase                   | Negative              |                                 |                         |                                      |                                              |                                                       |                                                               |
| #18                                                     | Community acquired    | Pneumonia         | <i>Klebsiella pneumoniae</i>  | Wild type                                | Negative              | Cefotaxime                      | Cefotaxime              | 28                                   | 52                                           | 24                                                    | 48                                                            |
| #19                                                     | Healthcare associated | Pneumonia         | <i>Escherichia coli</i>       | Acquired penicillinase                   | Negative              | Cefotaxime                      | Cefotaxime              | 34                                   | 58                                           | 24                                                    | 48                                                            |
| #21                                                     | Healthcare associated | Pneumonia         | <i>Escherichia coli</i>       | Wild type                                | Negative              | Cefotaxime                      | Cefotaxime              | 28                                   | 52                                           | 24                                                    | 48                                                            |
| #22                                                     | Healthcare associated | Pneumonia         | <i>Escherichia coli</i>       | Wild type                                | Negative              | Cefotaxime                      | Cefotaxime              | 44                                   | 68                                           | 28                                                    | 52                                                            |
| #23                                                     | Healthcare associated | Pneumonia         | <i>Klebsiella pneumoniae</i>  | Wild type                                | Negative              | Cefotaxime                      | Cefotaxime              | 24                                   | 52                                           | 24                                                    | 52                                                            |
| #24                                                     | Community acquired    | Pneumonia         | <i>Escherichia coli</i>       | Acquired penicillinase                   | Negative              | Cefotaxime                      | Cefotaxime              | 28                                   | 52                                           | 28                                                    | 52                                                            |
| #26                                                     | Healthcare associated | Pneumonia         | <i>Escherichia coli</i>       | Acquired penicillinase                   | Negative              | Cefotaxime                      | Cefotaxime              | 28                                   | 52                                           | 28                                                    | 52                                                            |
| #27                                                     | Community acquired    | Pneumonia         | <i>Escherichia coli</i>       | Wild type                                | Negative              | Cefotaxime                      | Cefotaxime              | 24                                   | 52                                           | 24                                                    | 52                                                            |
| #28                                                     | Healthcare associated | Pneumonia         | <i>Klebsiella pneumoniae</i>  | Wild type                                | Negative              | Cefotaxime                      | Cefotaxime              | 24                                   | 52                                           | 24                                                    | 52                                                            |
| #30                                                     | Community acquired    | UTI               | <i>Escherichia coli</i>       | Wild type                                | Negative              | Cefotaxime                      | Cefotaxime              | 44                                   | 68                                           | 28                                                    | 52                                                            |
| #32                                                     | Healthcare associated | Pneumonia         | <i>Klebsiella pneumoniae</i>  | Wild type                                | Negative              | Cefotaxime                      | Cefotaxime              | 24                                   | 48                                           | 24                                                    | 48                                                            |
| #33                                                     | Community acquired    | UTI               | <i>Escherichia coli</i>       | Wild type                                | Negative              | Cefotaxime                      | Cefotaxime              | 28                                   | 52                                           | 24                                                    | 48                                                            |
| #36                                                     | Community acquired    | Pneumonia         | <i>Klebsiella pneumoniae</i>  | Wild type                                | Negative              | Cefotaxime                      | Cefotaxime              | 24                                   | 51                                           | 24                                                    | 51                                                            |
| #38                                                     | Community acquired    | Pneumonia         | <i>Escherichia coli</i>       | Wild type                                | Negative              | Amoxicillin+Clavulanate         | Amoxicillin+Clavulanate | 43                                   | 67                                           | 27                                                    | 51                                                            |
| #39                                                     | Community acquired    | Pneumonia         | <i>Klebsiella pneumoniae</i>  | Wild type                                | Negative              | Cefotaxime                      | Cefotaxime              | 43                                   | 67                                           | 27                                                    | 51                                                            |
| #40                                                     | Community acquired    | Pneumonia         | <i>Enterobacter cloacae</i>   | Wild type                                | Negative              | Cefotaxime                      | Cefotaxime              | 24                                   | 48                                           | 24                                                    | 48                                                            |
| #42                                                     | Community acquired    | UTI               | <i>Klebsiella pneumoniae</i>  | Wild type                                | Negative              | Cefotaxime                      | Cefotaxime              | 30                                   | 54                                           | 27                                                    | 51                                                            |
| #43                                                     | Community acquired    | Pneumonia         | <i>Escherichia coli</i>       | Wild type                                | Negative              | Cefotaxime                      | Cefotaxime              | 24                                   | 48                                           | 24                                                    | 48                                                            |
|                                                         |                       |                   | <i>Citrobacter freundii</i>   | Wild type                                | Negative              |                                 |                         |                                      |                                              |                                                       |                                                               |
| #44                                                     | Healthcare associated | Pneumonia         | <i>Klebsiella oxytoca</i>     | Wild type                                | Negative              | Cefotaxime                      | Cefotaxime              | 28                                   | 52                                           | 27                                                    | 51                                                            |
| #47                                                     | Community acquired    | UTI               | <i>Escherichia coli</i>       | Wild type                                | Negative              | Cefotaxime                      | Cefotaxime              | 30                                   | 54                                           | 26                                                    | 50                                                            |
|                                                         |                       |                   | <i>Proteus mirabilis</i>      | Wild type                                | Negative              |                                 |                         |                                      |                                              |                                                       |                                                               |
| #48                                                     | Community acquired    | Pneumonia         | <i>Escherichia coli</i>       | Wild type                                | Negative              | Amoxicillin+Clavulanate         | Cefotaxime              | 26                                   | 49                                           | 24                                                    | 47                                                            |
| #54                                                     | Community acquired    | Peritonitis       | <i>Escherichia coli</i>       | Wild type                                | Negative              | Cefotaxime                      | Cefotaxime              | 37                                   | 61                                           | 26                                                    | 50                                                            |
| #58                                                     | Community acquired    | Peritonitis       | <i>Escherichia coli</i>       | Wild type                                | Negative              | Cefotaxime                      | Cefotaxime              | 48                                   | 60                                           | 44                                                    | 56                                                            |
| <b>Inappropriate empirical beta-lactam confirmation</b> |                       |                   |                               |                                          |                       |                                 |                         |                                      |                                              |                                                       |                                                               |
| #56                                                     | Community acquired    | UTI               | <i>Escherichia coli</i>       | Acquired cephalosporinase overproduction | <b>Negative</b>       | Cefotaxime                      | Cefotaxime              | 37                                   | 60                                           | 31                                                    | 54                                                            |
